# Supplementary material for: Topochemical engineering of composite hybrid fibers using layered double hydroxides and abietic acid
Source: publisher site journal article supplement (doi:10.3762/bjnano.10.60), 2019-02-28
Supplement: Additional file 1 [file 2190-4286-10-60-S1.pdf]

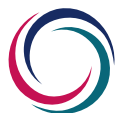

## Supporting Information

for

### **Topochemical engineering of composite hybrid fibers using layered double hydroxides and abietic acid**

Liji Sobhana, Lokesh Kesavan, Jan Gustafsson and Pedro Fardim

*Beilstein J. Nanotechnol.* **2019**, *10*, 589–605. [doi:10.3762/bjnano.10.60](https://doi.org/10.3762/bjnano.10.60)

## Additional experimental data

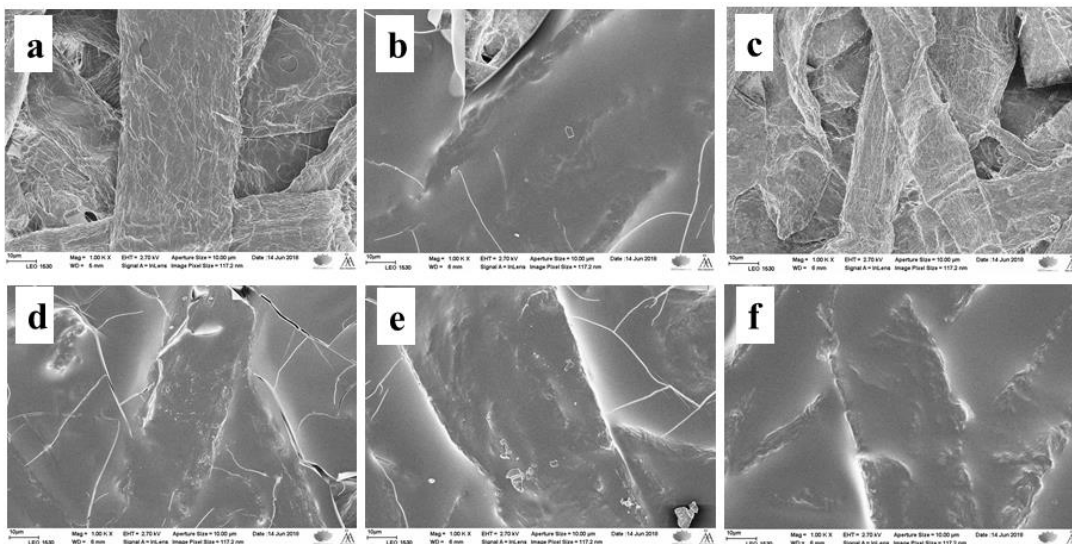

**Figure S1:** SEM images of the BKP fibres (a) REF (b) C-F (c) HF (d) C-HF (0.15 M) (e) C-HF (0.30 M) (f) C-HF (0.45 M).

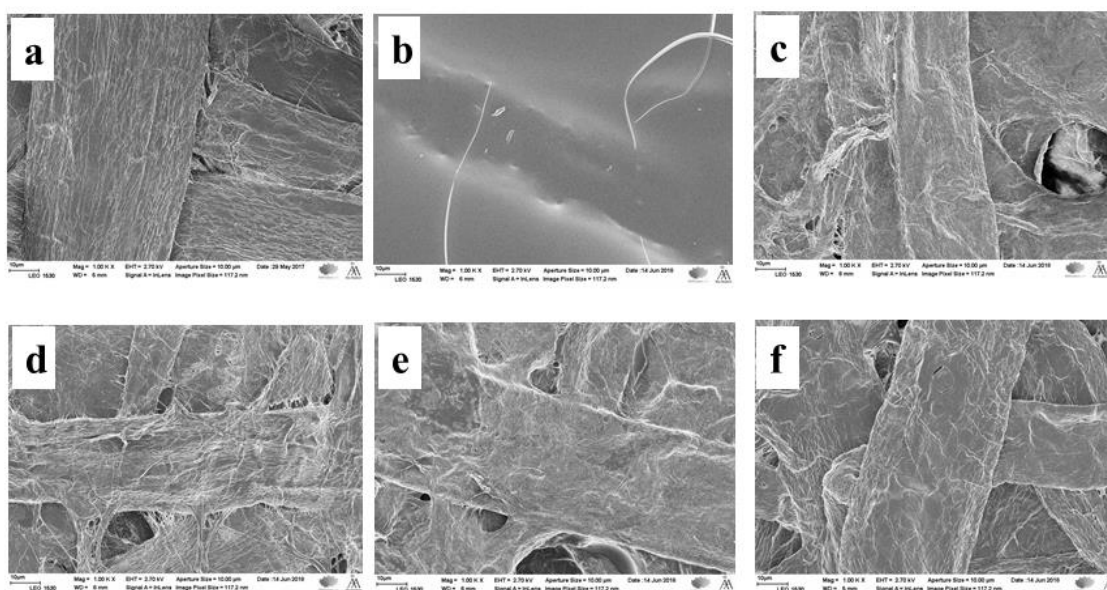

**Figure S2:** SEM images of the BKPR fibres (a) REF (b) C-F (c) HF (d) C-HF (0.15 M) (e) C-HF (0.30 M) (f) C-HF (0.45 M).

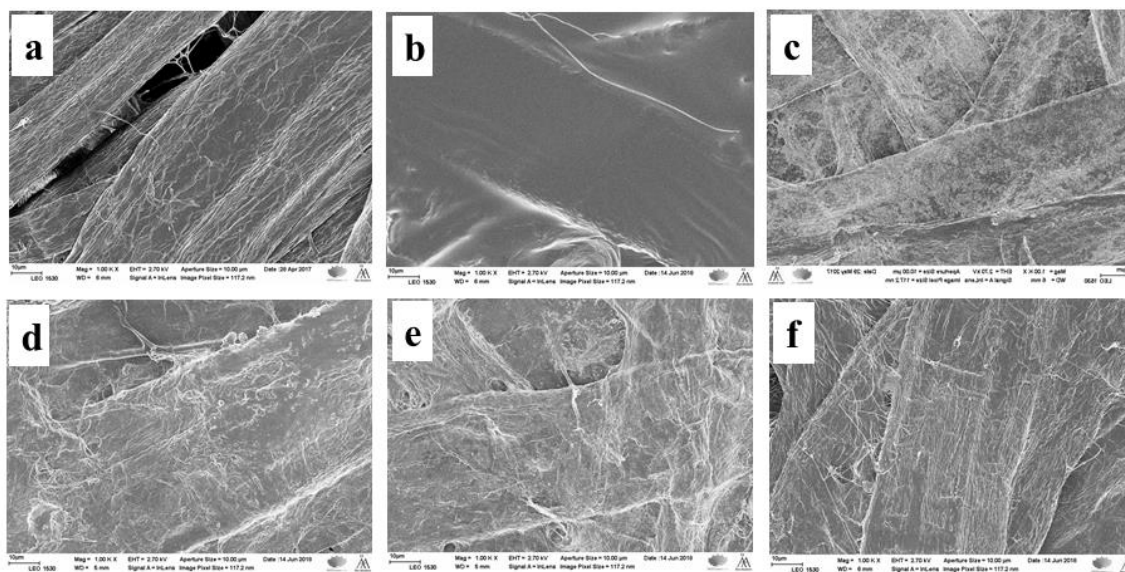

**Figure S3:** SEM images of the UBKP fibres (a) REF (b) C-F (c) HF (d) C-HF (0.15 M) (e) C-HF (0.30 M) (f) C-HF (0.45 M).

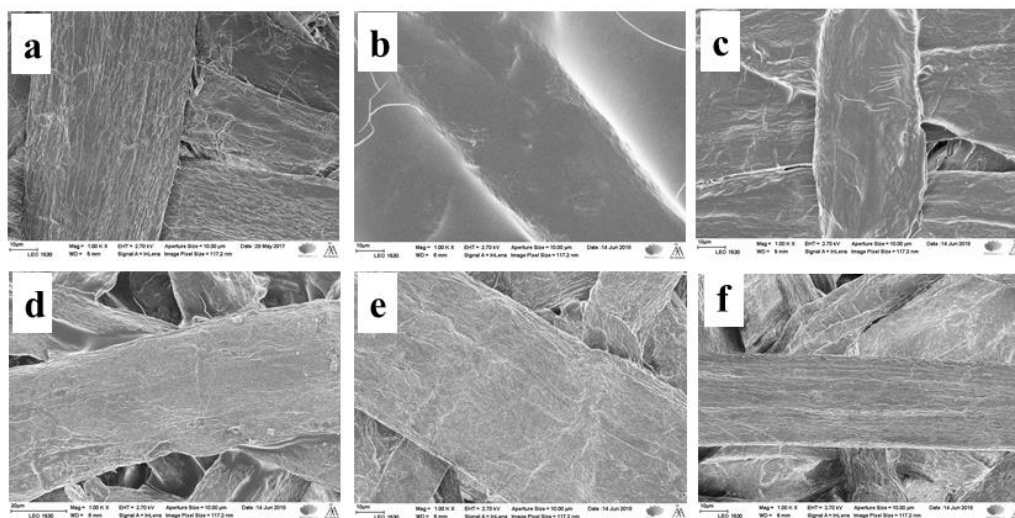

**Figure S4:** SEM images of the UBKPR fibres (a) REF (b) C-F (c) HF (d) C-HF (0.15 M) (e) C-HF (0.30 M) (f) C-HF (0.45 M).

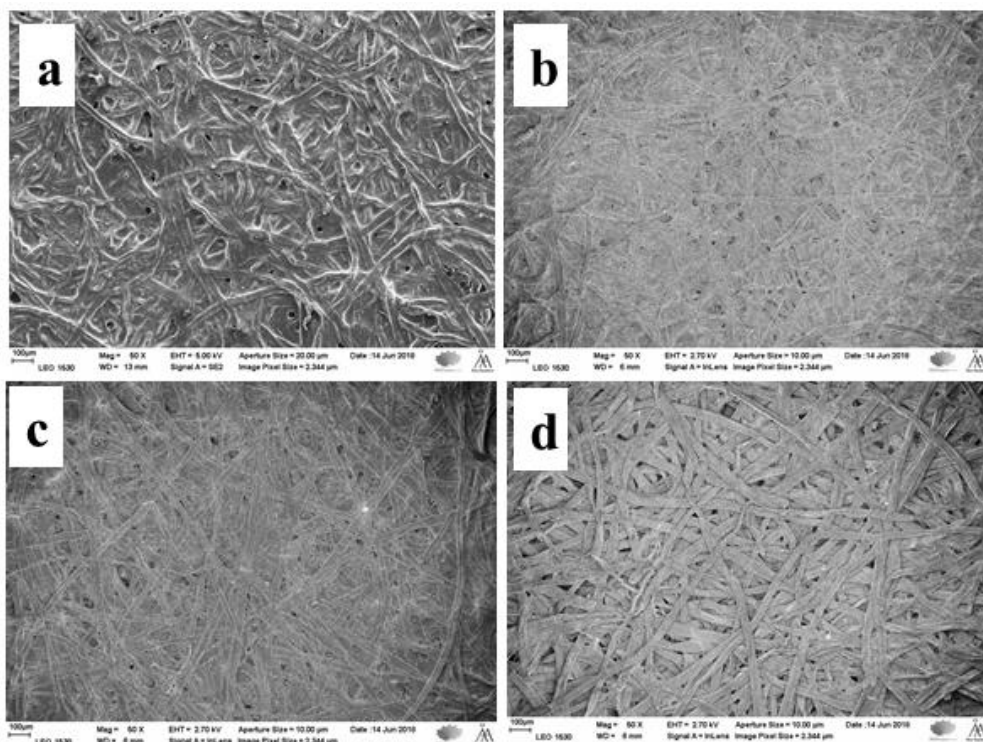

**Figure S5:** SEM images of C-HF under same grafting conditions (a) BKP (b) BKPR (c) UBKP (d) UBKPR.

**Table S1:** Tensile strength index of pulp fibers.

| Material     | Tensile strength index (kNm kg <sup>-1</sup> ) |              |              |              |
|--------------|------------------------------------------------|--------------|--------------|--------------|
|              | BKP                                            | BKPR         | UBKP         | UBKPR        |
| REF          | 16.21                                          | 50.18        | 8.93         | 72.10        |
| C-F          | 16.73                                          | 61.84        | 19.22        | 62.41        |
| HF           | 10.21                                          | 24.91        | 9.306        | 39.04        |
| C-HF (0.15M) | 20.40                                          | <b>49.57</b> | 21.88        | 37.68        |
| C-HF (0.30M) | 23.09                                          | 35.53        | <b>24.28</b> | <b>43.74</b> |
| C-HF (0.45M) | <b>30.75</b>                                   | 30.00        | 21.11        | 41.26        |

**Table S2:** ISO brightness of pulp fibers.

| <b>Material</b> | <b>ISO brightness (%)</b> |             |             |              |
|-----------------|---------------------------|-------------|-------------|--------------|
|                 | <b>BKP</b>                | <b>BKPR</b> | <b>UBKP</b> | <b>UBKPR</b> |
| REF             | 84.80                     | 83.96       | 27.15       | 21.54        |
| C-F             | 74.95                     | 66.09       | 9.31        | ND           |
| HF              | 85.16                     | 81.67       | 21.99       | 22.70        |
| C-HF (0.15M)    | 34.09                     | 43.40       | 18.65       | ND           |
| C-HF (0.30M)    | 39.58                     | 25.34       | 12.81       | ND           |
| C-HF (0.45M)    | 34.34                     | 34.17       | 13.21       | ND           |
